# Supplementary material
Source: PubMed Central journal article supplement (PMC4794350)
Supplement: NIHMS759071-supplement-Author_addition_agreements.pdf [file NIHMS759071-supplement-Author_addition_agreements.pdf]

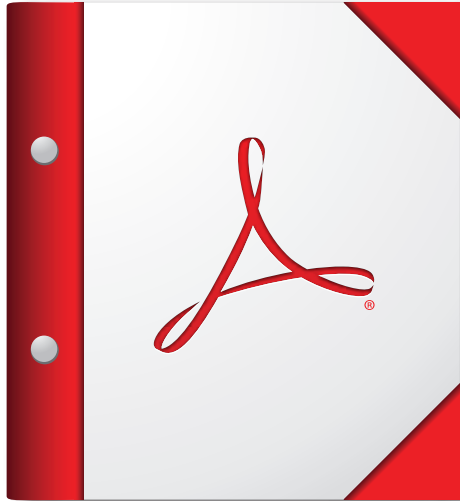

**For the best experience, open this PDF portfolio in  
Acrobat X or Adobe Reader X, or later.**

[Get Adobe Reader Now!](#)
